# Supplementary material
Source: PubMed Central journal article supplement (PMC7481934)
Supplement: NIHMS1621859-supplement-Supplemental_Guide.pdf [file NIHMS1621859-supplement-Supplemental_Guide.pdf]

## SI Guide

### Phase separation directs ubiquitination of gene body nucleosomes

Laura D. Gallego,<sup>1,\*</sup> Maren Schneider,<sup>1,\*</sup> Chitvan Mittal,<sup>2,\*</sup> Anete Romanauska,<sup>1</sup> Ricardo M. Gudino Carrillo,<sup>1</sup> Tobias Schubert,<sup>1</sup> B. Franklin Pugh,<sup>2</sup> and Alwin Köhler<sup>1,#</sup>

<sup>1</sup>Max Perutz Labs, Medical University of Vienna, Vienna Biocenter Campus (VBC), Dr. Bohr-Gasse 9/3, 1030 Vienna, Austria

<sup>2</sup>Department of Biochemistry and Molecular Biology, Center for Eukaryotic Gene Regulation, Pennsylvania State University, University Park, PA 16802, USA

### Supplemental Information

Supplemental Information includes two Videos, Supplemental Table (strains and plasmids), and two Supplemental Figures with uncropped gels and blots.

**Video S1. Lge1 condensates grow by fusion.** DIC imaging of 6His-Lge1 (5  $\mu$ M) diluted in 20 mM Tris pH 7.5, 100 mM NaCl, 1 mM DTT. Protein solution was pipetted into a 16-well  $\mu$ -slide chamber and incubated at 20 °C. Imaging was started after 15 min and images were taken every 2 sec for 2 min. Scale bar, 5  $\mu$ m.

**Video S2. Bre1 shell prevents Lge1 condensate fusion.** DIC imaging of 6His-Lge1 (1.5  $\mu$ M) with Bre1 shell (1.5  $\mu$ M). Proteins were mixed and treated as in **Video S1**. Scale bar, 5  $\mu$ m.

**Supplemental Figure 1.** Uncropped scans related to Main Figures.

**Supplemental Figure 2.** Uncropped scans related to Extended Data Figures.
